# Supplementary material for: Towards real-time myocardial infarction diagnosis: a convergence of machine learning and ion-exchange membrane technologies leveraging miRNA signatures
Source: Royal Society of Chemistry journal article supplement (doi:10.1039/d4lc00640b), 2024-01-01
Supplement: d4lc00640b1.pdf [file d4lc00640b1.pdf]

## Supplementary Information

### **Towards Real-Time Myocardial Infarction Diagnosis: A Convergence of Machine Learning and Ion-Exchange Membrane Technologies Leveraging miRNA Signatures**

Xiang Ren<sup>†\*\*</sup>, Ruyu Zhou<sup>‡</sup>, George Ronan<sup>†</sup>, S. Gulberk Ozcebe<sup>†</sup>, Jiaying Ji<sup>†</sup>, Satyajyoti Senapati<sup>§</sup>, Keith L. March<sup>^</sup>, Eileen Handberg<sup>^</sup>, David Anderson<sup>^</sup>, Carl J. Pepine<sup>^</sup>, Hsueh-Chia Chang<sup>§</sup>, Fang Liu<sup>‡</sup>, Pinar Zorlutuna<sup>†\*</sup>

<sup>†</sup> Department of Aerospace and Mechanical Engineering, University of Notre Dame, Notre Dame, IN 46556

<sup>\*\*</sup>Current affiliation: Department of Microelectronics, Tianjin University, Tianjin, 300072, China

<sup>‡</sup> Department of Applied and Computational Mathematics and Statistics, University of Notre Dame, Notre Dame, IN 46556

<sup>§</sup> Department of Chemical and Biomolecular Engineering, University of Notre Dame, Notre Dame, IN 46556

<sup>^</sup> Division of Cardiology, Department of Medicine in the College of Medicine, University of Florida, Gainesville, FL 32611

\*Corresponding author: pinar.zorlutuna.1@nd.edu; Phone: (574)631-8543

#### 1. Clinical samples

Blood was collected via standard venous puncture from healthy reference subjects (NCAD), patients diagnosed with CAD, and patients diagnosed with STEMI with an observed obstruction (STEMI-pre) and following reperfusion (STEMI-PCI) into tubes containing ethylenediaminetetraacetic acid (EDTA). After collection, plasma was isolated by centrifuging at 1000×g for 5 min and plasma was transferred to RNA free tubes and stored at -80°C and shipped to the University of Notre Dame. Once the samples arrived at Notre Dame, they were thawed on ice, aliquoted and stored at -80°C until experiments. The protocol was approved by University of Florida IRB (#201901232) and all subjects provided written informed consent.

## 2. Oligoprobes and calibration miRNAs

Table 1. Oligoprobes and the calibration miRNA.

| miRNA name  | Oligoprobes and molecular weight                               | Calibration and molecular weight                      |
|-------------|----------------------------------------------------------------|-------------------------------------------------------|
| miR-1-1     | 5'-/5AmMC12/ATA CAT ACT TCT TTA CAT TCC A-3', MW=6866.7 g/mol  | 5'-TGG AAT GTA AAG AAG TAT GTA T-3', MW=6861.5 g/mol  |
| miR-208b    | 5'-/5AmMC12/ACA AAC CTT TTG TTG GTC TTA T-3', MW=6913.7 g/mol  | 5'-ATA AGA CGA ACA AAA GGT TTG T-3', MW=6815.5 g/mol  |
| miR-499-5p  | 5'-/5AmMC12/AAA CAT CAC TGC AAG TCT TAA-3', MW=6645.6 g/mol    | 5'-TTA AGA CTT GCA GTG ATG TTT-3', MW=6466.3 g/mol    |
| miR-200b-3p | 5'-/5AmMC12/TCA TCA TTA CCA GGC AGT ATT A-3', MW=6956.7 g/mol  | 5'-TAA TAC TGC CTG GTA ATG ATG A-3', MW=6773.5 g/mol  |
| miR-543     | 5'-/5AmMC12/AAG AAG TGC ACC GCG AAT GTT T-3', MW=7046.8 g/mol  | 5'-AAA CAT TCG CGG TGC ACT TCT T-3', MW=6685.4 g/mol  |
| miR-331-3p  | 5'-/5AmMC12/TTC TAG GAT AGG CCC AGG GGC-3', MW=6750.6 g/mol    | 5'-GCC CCT GGG CCT ATC CTA GAA-3', MW=6367.2 g/mol    |
| miR-3605-5p | 5'-/5AmMC12/GGC TTC CTT GCT ATC CAT CCT CA-3', MW=7164.8 g/mol | 5'-TGA GGA TGG ATA GCA AGG AAG CC-3', MW=7186.7 g/mol |
| miR-301a-3p | 5'-/5AmMC12/GCT TTG ACA ATA CTA TTG CAC TG-3', MW=7276.9 g/mol | 5'-CAG TGC AAT AGT ATT GTC AAA GC-3', MW=7071.7 g/mol |
| miR-18a-5p  | 5'-/5AmMC12/CTA TCT GCA CTA GAT GCA CCT TA-3', MW=7221.9 g/mol | 5'-TAA GGT GCA TCT AGT GCA GAT AG-3', MW=7127.7 g/mol |
| miR-423-5p  | 5'-/5AmMC12/AAA GTC TCG CTC TCT GCC CCT CA-3', MW=7158.8 g/mol | 5'-TGA GGG GCA GAG AGC GAG ACT TT-3', MW=7193.7 g/mol |
| miR-142-5p  | 5'-/5AmMC12/AGT AGT GCT TTC TAC TTT ATG-3', MW=6680.5 g/mol    | 5'-CAT AAA GTA GAA AGC ACT ACT-3', MW=6431.3 g/mol    |
| miR-132-3p  | 5'-/5AmMC12/CGA CCA TGG CTG TAG ACT GTT A-3', MW=7013.7 g/mol  | 5'-TAA CAG TCT ACA GCC ATG GTC G-3', MW=6719.4 g/mol  |



#### 4. Additional information of the selected patient samples

##### Random samples

|                   | Age | Gender | Diabetes | Onset Hours (pre/post) | Troponin I (pg/mL) |
|-------------------|-----|--------|----------|------------------------|--------------------|
| <b>NCAD</b>       | 47  | F      | No       |                        |                    |
|                   | 23  | F      | No       |                        |                    |
|                   | 38  | M      | No       |                        |                    |
| <b>CAD</b>        | 57  | M      | Unknown  |                        |                    |
|                   | 73  | M      | No       |                        |                    |
|                   | 49  | F      | Yes      |                        |                    |
| <b>MI-Pre/PCI</b> | 55  | M      | No       | 2.73→3.59              | 799                |
|                   | 65  | F      | No       | 53.98→54.86            | NA                 |
|                   | 80  | F      | Yes      | 98.15→98.7             | 3966               |
|                   | 45  | M      | No       | 5.45→5.9               | 868                |
|                   | 58  | F      | No       | 97.55→98.18            | <6                 |
|                   | 50  | M      | No       | 32.72→33.24            | 49                 |

##### Matched samples

|                   | Age | Gender | Diabetes | Onset Hours (pre/post) | Troponin I (pg/mL) |
|-------------------|-----|--------|----------|------------------------|--------------------|
| <b>NCAD</b>       | 63  | F      | No       |                        |                    |
|                   | 65  | F      | No       |                        |                    |
|                   | 63  | M      | No       |                        |                    |
|                   | 63  | M      | No       |                        |                    |
|                   | 67  | F      | No       |                        |                    |
|                   | 67  | M      | No       |                        |                    |
| <b>CAD</b>        | 63  | M      | No       |                        |                    |
|                   | 65  | M      | No       |                        |                    |
|                   | 62  | F      | No       |                        |                    |
|                   | 65  | F      | No       |                        |                    |
|                   | 61  | F      | No       |                        |                    |
|                   | 66  | M      | No       |                        |                    |
| <b>MI-Pre/PCI</b> | 58  | F      | No       | 2.57→3.29              | 8                  |
|                   | 50  | M      | No       | 1.65→2.48              | 27000              |
|                   | 67  | M      | No       | 5.55→6.05              | 2170               |
|                   | 64  | F      | No       | 1.25→2.25              | 6                  |
|                   | 73  | M      | No       | 2.45→3.53              | 30                 |
|                   | 66  | M      | No       | 1.27→1.80              | 11829              |

## 5. MIX.miR binding affinity of different miRNAs

miRNA binding affinity

$$\Delta G = RT \cdot \ln \left( \frac{[DNA \cdot Primer]}{[DNA][Primer]} \right)$$

| miRNA    | $\Delta G$ (kcal/mol) |
|----------|-----------------------|
| miR-1    | 22.9                  |
| miR-208b | 25.5                  |
| miR-499  | 23.9                  |
| miR-200b | 25.1                  |
| miR-543  | 29.8                  |
| miR-331  | 28.9                  |
| miR-3605 | 30.2                  |
| miR-301a | 27                    |
| miR-18a  | 27.7                  |
| miR-423  | 32.5                  |
| miR-142  | 22.6                  |
| miR-132  | 28.5                  |
